# Supplementary material
Source: publisher site journal article supplement (https://www.dovepress.com/article/356443)
Supplement: Supplementary file 1 [file get_supplementary_file.php]

**Appendix 1: Data Collection Tools**

**Facility name …………………………………**

Initials of participant’s names: …………... Participant’s study ID number………………

Chest X-ray Number: …………………….. X-ray Type/make…………………………..

1. **Socio-demographic data:**

Age: …………..years

Sex (M/F): ………

Weight: …………...Kgs

Height: ……………cm

1. **Clinical history:**

Blood pressure: …………………mmHg

Hypertension: YES……NO………………. Chest deformity YES……NO………

1. **Chest x-ray**

Indication for chest x-ray…………………………………….

Conclusion on chest x-ray by radiologists …………………………………………………………………………………………………………………………………………………………………………………………………..

1. **Aortic knob measurements in cm**

- On digital screen………………………………..
- On plain film……………………………………

1. **Other measurements**

Heart size ……………….… cm

Transverse diameter of thorax……………cm

Mediastinal width at the level of aortic knob…………………….cm

1. **Study participants’ comments on the experience of procedures.** ………………………………………………………………………………………………………………………………………………………………………………………………
